# Supplementary material for: Outdoor air pollution and the risk of asthma exacerbations in single lag0 and lag1 exposure patterns: A systematic review and meta-analysis
Source: medRxiv preprint, doi:10.1101/2021.02.04.21251113, version 1 (2021-02-05)
Supplement: Figure S2. Begg's funnel plot for relationships between air pollutants and asthma exacerbations in overall analyses [file 251113_file07.docx]

Figure S2-1 Begg’s funnel plot for relationship between AQI and asthma exacerbations with lag0 exposure in overall analyses (p=0.308)

Figure S2-2 Begg’s funnel plot for relationship between PM2.5 and asthma exacerbations with lag0 exposure in overall analyses (p=0.687)

Figure S2-3 Begg’s funnel plot for relationship between PM10 and asthma exacerbations with lag0 exposure in overall analyses (p=0.664)

Figure S2-4 Begg’s funnel plot for relationship between SO2 and asthma exacerbations with lag0 exposure in overall analyses (p=0.026)

Figure S2-5 Begg’s funnel plot for relationship between NO2 and asthma exacerbations with lag0 exposure in overall analyses (p=0.631)

Figure S2-6 Begg’s funnel plot for relationship between CO and asthma exacerbations with lag0 exposure in overall analyses (p=0.322)

Figure S2-7 Begg’s funnel plot for relationship between O3 and asthma exacerbations with lag0 exposure in overall analyses (p=0.015)

Figure S2-8 Begg’s funnel plot for relationship between AQI and asthma exacerbations with lag1 exposure in overall analyses (p=0.308)

Figure S2-9 Begg’s funnel plot for relationship between PM2.5 and asthma exacerbations with lag1 exposure in overall analyses (p=0.835)

Figure S2-10 Begg’s funnel plot for relationship between PM10 and asthma exacerbations with lag1 exposure in overall analyses (p=0.253)

Figure S2-11 Begg’s funnel plot for relationship between SO2 and asthma exacerbations with lag1 exposure in overall analyses (p=0.478)

Figure S2-12 Begg’s funnel plot for relationship between NO2 and asthma exacerbations with lag1 exposure in overall analyses (p=0.168)

Figure S2-13 Begg’s funnel plot for relationship between CO and asthma exacerbations with lag1 exposure in overall analyses (p=0.124)

Figure S2-14 Begg’s funnel plot for relationship between O3 and asthma exacerbations with lag1 exposure in overall analyses (p=0.059)
